# Supplementary material for: The Transcriptional Stress Response of Candida albicans to Weak Organic Acids
Source: PubMed Central journal article supplement (PMC4390566; doi:10.1534/g3.114.015941), 2015-01-29
Supplement: supp_g3.114.015941_FigureS5.pdf [file supp_g3.114.015941_FigureS5.pdf]

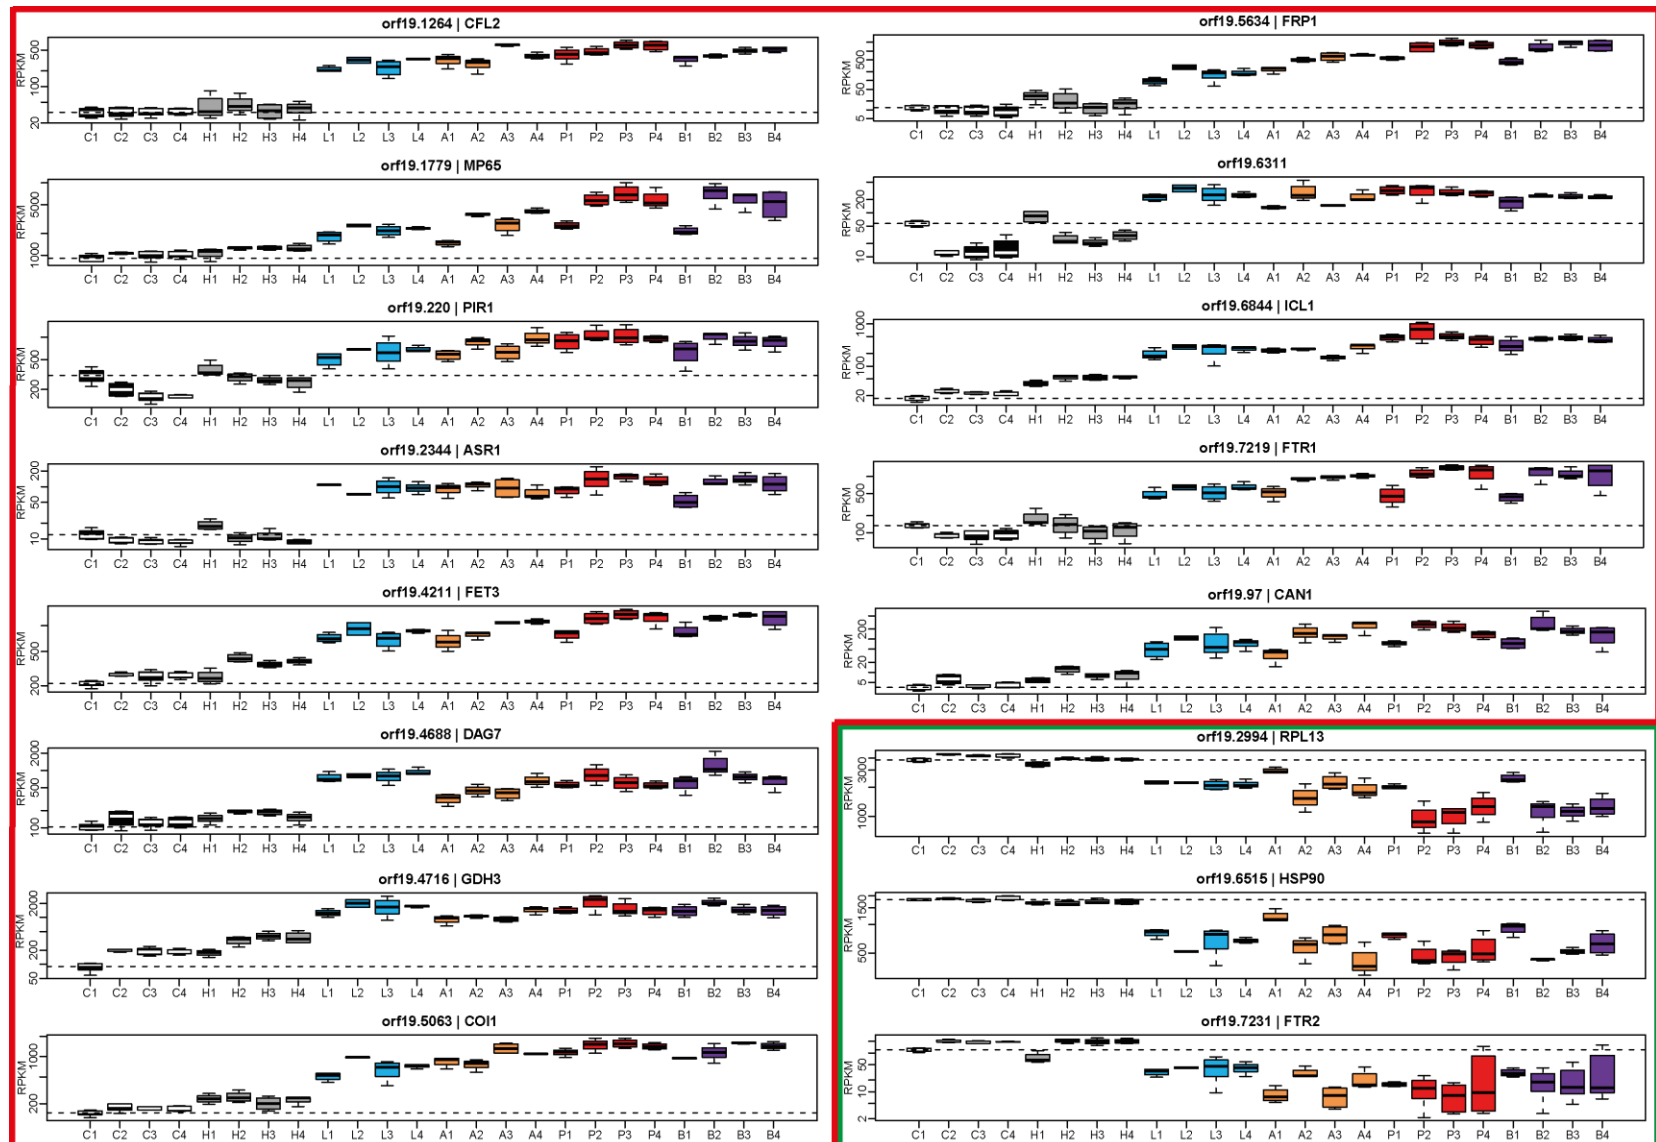

**Figure S5** Expression levels of the 16 core genes commonly regulated by all WOAs at all times. Genes included in the red frame were up-regulated in presence of all WOAs throughout the time course, while the genes framed in green were consistently down-regulated. Data are represented as boxplots to show the distribution across the biological replicates.
