# Supplementary material for: The Transcriptional Stress Response of Candida albicans to Weak Organic Acids
Source: PubMed Central journal article supplement (PMC4390566; doi:10.1534/g3.114.015941), 2015-01-29
Supplement: supp_g3.114.015941_FileS3.pdf [file supp_g3.114.015941_FileS3.pdf]

## File S3

### Additional Materials and Methods

**Quantitative real-time PCR analysis.** RNA extraction for validation of transcript expression was performed using the Qiagen RNeasy kit (Qiagen) and cDNA was then synthesized using the Superscript III kit (Invitrogen) in 20  $\mu$ l reaction volumes starting with  $\sim$ 100 ng of total RNA per sample as per manufacturers' protocol. qPCR reactions were then set up in 384-well plates and cycled using an ABI 7900HT (Applied Biosystems) in 10  $\mu$ l reaction volumes as described previously (Pavelka et al. 2010) using primers listed in Tables S3.
