# Supplementary material for: The Transcriptional Stress Response of Candida albicans to Weak Organic Acids
Source: PubMed Central journal article supplement (PMC4390566; doi:10.1534/g3.114.015941), 2015-01-29
Supplement: supp_g3.114.015941_TableS1.pdf [file supp_g3.114.015941_TableS1.pdf]

**Table S1 Genes significantly regulated in response to each WOA at all time points.** Genes differentially expressed in response to lactic, acetic, propionic or butyric acid at T1, T2, T3 and T4. These lists were used to draw the Venn diagram in Figure 3D. Transcript identifiers refer to the *C. albicans* Assembly 21 genome annotation.

| Weak organic acid | Genes significantly regulated in the same direction at all time-points                                                                                                                                                                                                                                                                                                                                                                                                                                                                                                                                                                                                                                                                                                                                                                                                                                                                                                                                                                                                                                                                                                                                                                                                                                                                                                                                                                                                                                                                                                                                                                                                                                                                                                                                                                                                                                                                                                                                                                                                                                                                                                                                                                                                                                                                                                                                                                                                                                                                                               |
|-------------------|----------------------------------------------------------------------------------------------------------------------------------------------------------------------------------------------------------------------------------------------------------------------------------------------------------------------------------------------------------------------------------------------------------------------------------------------------------------------------------------------------------------------------------------------------------------------------------------------------------------------------------------------------------------------------------------------------------------------------------------------------------------------------------------------------------------------------------------------------------------------------------------------------------------------------------------------------------------------------------------------------------------------------------------------------------------------------------------------------------------------------------------------------------------------------------------------------------------------------------------------------------------------------------------------------------------------------------------------------------------------------------------------------------------------------------------------------------------------------------------------------------------------------------------------------------------------------------------------------------------------------------------------------------------------------------------------------------------------------------------------------------------------------------------------------------------------------------------------------------------------------------------------------------------------------------------------------------------------------------------------------------------------------------------------------------------------------------------------------------------------------------------------------------------------------------------------------------------------------------------------------------------------------------------------------------------------------------------------------------------------------------------------------------------------------------------------------------------------------------------------------------------------------------------------------------------------|
| Lactic            | orf19.1075.1, orf19.125, orf19.1264, orf19.1358, orf19.1480, orf19.1779, orf19.1857, orf19.2021, orf19.2066.1, orf19.220, orf19.2344, orf19.251, orf19.2525, orf19.2765, orf19.3160, orf19.3171, orf19.3340, orf19.3548.1, orf19.3954.1, orf19.4211, orf19.4216, orf19.4506, orf19.4551, orf19.4688, orf19.4716, orf19.5000, orf19.5005, orf19.5032, orf19.5063, orf19.5213.1, orf19.5517, orf19.5610, orf19.5634, orf19.5653, orf19.5753, orf19.5805, orf19.6165, orf19.6311, orf19.6724, orf19.6757, orf19.6844, orf19.6854, orf19.691, orf19.7219, orf19.7279.1, orf19.7398.1, orf19.7417, orf19.7469, orf19.789, orf19.97, ITS2, orf19.1030, orf19.1389, orf19.1697, orf19.200, orf19.2111.2, orf19.2767, orf19.2994, orf19.3572.3, orf19.3810, orf19.4054, orf19.4336, orf19.4492, orf19.4623, orf19.4660, orf19.4909.1, orf19.493, orf19.5225.2, orf19.5351, orf19.5904, orf19.5943.1, orf19.5964.2, orf19.6220.4, orf19.6414.3, orf19.6515, orf19.7018, orf19.7046, orf19.7231, orf19.7477, orf19.827.1, orf19.962                                                                                                                                                                                                                                                                                                                                                                                                                                                                                                                                                                                                                                                                                                                                                                                                                                                                                                                                                                                                                                                                                                                                                                                                                                                                                                                                                                                                                                                                                                                                            |
| Acetic            | orf19.1263, orf19.1264, orf19.1395, orf19.1779, orf19.2062, orf19.220, orf19.2344, orf19.2762, orf19.3160, orf19.3461, orf19.3548.1, orf19.4211, orf19.4216, orf19.4505, orf19.4688, orf19.4716, orf19.4802, orf19.5063, orf19.5634, orf19.5952, orf19.6073, orf19.6116, orf19.6311, orf19.6844, orf19.7021, orf19.7111.1, orf19.7219, orf19.734, orf19.97, orf19.1065, orf19.1517, orf19.238, orf19.2767, orf19.2994, orf19.3433, orf19.386, orf19.4674.1, orf19.6515, orf19.6948, orf19.7046, orf19.7231                                                                                                                                                                                                                                                                                                                                                                                                                                                                                                                                                                                                                                                                                                                                                                                                                                                                                                                                                                                                                                                                                                                                                                                                                                                                                                                                                                                                                                                                                                                                                                                                                                                                                                                                                                                                                                                                                                                                                                                                                                                           |
| Propionic         | orf19.1030, orf19.1065, orf19.1154, orf19.1470, orf19.1517, orf19.1601, orf19.1697, orf19.1700, orf19.1770, orf19.1853, orf19.1996, orf19.2067, orf19.2091, orf19.2111.2, orf19.2179.2, orf19.2232, orf19.2310.1, orf19.2329.1, orf19.236, orf19.238, orf19.2422, orf19.2451, orf19.2478.1, orf19.269, orf19.2709, orf19.2767, orf19.2859, orf19.2864.1, orf19.2871, orf19.2935, orf19.2948, orf19.2994, orf19.3002, orf19.3034, orf19.3087, orf19.3138, orf19.3175, orf19.3325.3, orf19.336, orf19.3396, orf19.3415.1, orf19.3426, orf19.3433, orf19.3572.3, orf19.3788.1, orf19.3789, orf19.3810, orf19.3812, orf19.385, orf19.386, orf19.3870, orf19.3962, orf19.4026, orf19.4040, orf19.4060, orf19.4093, orf19.4336, orf19.4375.1, orf19.4447, orf19.4468, orf19.4490, orf19.4492, orf19.4622, orf19.4623, orf19.4660, orf19.4674.1, orf19.4758, orf19.4909.1, orf19.493, orf19.5077, orf19.5126, orf19.5225.2, orf19.526, orf19.5341, orf19.5351, orf19.5466, orf19.5750, orf19.5838, orf19.5858, orf19.5904, orf19.5943.1, orf19.5949, orf19.5964.2, orf19.6002, orf19.6085, orf19.6090, orf19.6220.4, orf19.6253, orf19.6264.4, orf19.6265, orf19.6286.2, orf19.6375, orf19.637, orf19.6515, orf19.6541, orf19.6632, orf19.6702, orf19.6749, orf19.6785, orf19.687.1, orf19.6948, orf19.7018, orf19.7046, orf19.7048.1, orf19.7050, orf19.7161, orf19.7217, orf19.7231, orf19.7236, orf19.7397.1, orf19.7424, orf19.7477, orf19.7654, orf19.827.1, orf19.838.1, orf19.1075.1, orf19.1149, orf19.1227, orf19.1237, orf19.125, orf19.1263, orf19.1264, orf19.1339, orf19.1395, orf19.1690, orf19.1779, orf19.1891, orf19.1974, orf19.2062, orf19.2125, orf19.2158, orf19.2179, orf19.220, orf19.2344, orf19.23, orf19.2608, orf19.2686, orf19.2762, orf19.2990, orf19.3053, orf19.3104, orf19.3234, orf19.3340, orf19.3378, orf19.3461, orf19.3507, orf19.3538, orf19.3612, orf19.36.1, orf19.3732, orf19.4082, orf19.4211, orf19.4505, orf19.4565, orf19.4630, orf19.4688, orf19.4716, orf19.4802, orf19.4833, orf19.4886, orf19.4905, orf19.5024, orf19.5063, orf19.5112, orf19.5379, orf19.5517, orf19.5610, orf19.5634, orf19.5653, orf19.5683, orf19.5686, orf19.5730, orf19.5777, orf19.5791, orf19.5801, orf19.5805, orf19.5952, orf19.6073, orf19.6116, orf19.6311, orf19.6318, orf19.638, orf19.6840, orf19.6844, orf19.6854, orf19.6877, orf19.6951, orf19.7021, orf19.7111.1, orf19.7196, orf19.7219, orf19.7279.1, orf19.7306, orf19.734, orf19.7398.1, orf19.7417, orf19.7469, orf19.7531, orf19.7611, orf19.7676, orf19.767, orf19.822, orf19.97 |
| Butyric           | orf19.1030, orf19.1065, orf19.1517, orf19.1601, orf19.1697, orf19.2111.2, orf19.238, orf19.2451, orf19.2864.1, orf19.2994, orf19.3002, orf19.3175, orf19.3572.3, orf19.3810, orf19.385, orf19.386, orf19.4040, orf19.4336, orf19.4447, orf19.4660, orf19.4674.1, orf19.4909.1, orf19.493, orf19.5225.2, orf19.5466, orf19.5750, orf19.5858, orf19.5904, orf19.5943.1, orf19.5964.2, orf19.6090, orf19.6220.4, orf19.6515, orf19.6541, orf19.6632, orf19.687.1, orf19.6948, orf19.7018, orf19.7231, orf19.827.1, orf19.838.1, orf19.1048, orf19.1075.1, orf19.1149, orf19.1227, orf19.1237, orf19.125, orf19.1263, orf19.1264, orf19.1339, orf19.1395, orf19.1690, orf19.1779, orf19.1891, orf19.1974, orf19.2062, orf19.2158, orf19.2160, orf19.220, orf19.2344, orf19.2762, orf19.3104, orf19.3234, orf19.3340, orf19.3378, orf19.3461, orf19.3507, orf19.3612, orf19.36.1, orf19.4211, orf19.4505, orf19.4565, orf19.4609, orf19.4688, orf19.4716, orf19.4773, orf19.4802, orf19.4833, orf19.4886, orf19.4905, orf19.5063, orf19.5112, orf19.5379, orf19.5517, orf19.5610, orf19.5634, orf19.5653, orf19.5683, orf19.5686, orf19.5730, orf19.5791, orf19.5801, orf19.5805, orf19.5952, orf19.6073, orf19.6116, orf19.6311, orf19.6318, orf19.638, orf19.6844, orf19.6854, orf19.6877, orf19.6951, orf19.7111.1, orf19.7112, orf19.7196, orf19.7219, orf19.7279.1, orf19.7306, orf19.734, orf19.7398.1, orf19.7417, orf19.7469, orf19.7531, orf19.7611, orf19.822, orf19.97                                                                                                                                                                                                                                                                                                                                                                                                                                                                                                                                                                                                                                                                                                                                                                                                                                                                                                                                                                                                                                                                                         |
