# Supplementary material for: The Transcriptional Stress Response of Candida albicans to Weak Organic Acids
Source: PubMed Central journal article supplement (PMC4390566; doi:10.1534/g3.114.015941), 2015-01-29
Supplement: supp_g3.114.015941_TableS2.pdf [file supp_g3.114.015941_TableS2.pdf]

**Table S2 Comparison of the 16 WOA core response genes to previously published *C. albicans* transcriptional stress responses.** The presence of each of the 16 core response genes to WOAs (13 up-regulated and 3 down-regulated genes) in previously published gene lists was evaluated. A bullet symbolizes that the indicated WOA core response transcript was found to be at least two-fold up-regulated (A) or down-regulated (B) in the previously published *C. albicans* transcriptional stress response indicated in the corresponding column header. Genes consistently up-regulated (A) or consistently down-regulated (B) in both gene lists are highlighted in pink (A) or light blue (B), respectively.

(A) Genes up-regulated in previously published *C. albicans* stress responses.

| WOA core response |            | Acetic acid<br>20mM (5h) | Ammonium<br>iron(II)<br>sulfate<br>10µM | 23 to 37 °C<br>(30min) | NaCl 0.3M<br>(30min) | H <sub>2</sub> O <sub>2</sub><br>0.4mM<br>(30min) | H <sub>2</sub> O <sub>2</sub><br>0.5mM<br>(15min) | H <sub>2</sub> O <sub>2</sub> 5mM<br>(15min) | DPTA-<br>NONOate<br>1mM<br>(15min) | Congo red<br>100µg/µl<br>(2h) | Foetal calf<br>serum 10%<br>(1h) | pH 4 vs. pH<br>8 (4h)<br>[Bruno et<br>al.] | pH 4 vs. pH<br>8 (4h)<br>[Bensen et<br>al.] |
|-------------------|------------|--------------------------|-----------------------------------------|------------------------|----------------------|---------------------------------------------------|---------------------------------------------------|----------------------------------------------|------------------------------------|-------------------------------|----------------------------------|--------------------------------------------|---------------------------------------------|
| UP                | orf19.1264 | CFL2                     | •                                       |                        |                      |                                                   | •                                                 |                                              | •                                  |                               |                                  |                                            | •                                           |
|                   | orf19.1779 | MP65                     |                                         |                        |                      |                                                   |                                                   |                                              |                                    |                               |                                  |                                            | •                                           |
|                   | orf19.220  | PIR1                     | •                                       |                        |                      |                                                   |                                                   |                                              |                                    |                               |                                  |                                            |                                             |
|                   | orf19.2344 | ASR1                     |                                         |                        | •                    | •                                                 |                                                   | •                                            | •                                  | •                             | •                                | •                                          |                                             |
|                   | orf19.4211 | FET3                     |                                         |                        |                      |                                                   |                                                   |                                              | •                                  |                               |                                  |                                            |                                             |
|                   | orf19.4688 | DAG7                     |                                         |                        |                      | •                                                 |                                                   |                                              | •                                  |                               |                                  | •                                          |                                             |
|                   | orf19.4716 | GDH3                     |                                         |                        |                      |                                                   | •                                                 |                                              |                                    |                               |                                  |                                            |                                             |
|                   | orf19.5063 | COI1                     |                                         | •                      |                      |                                                   |                                                   |                                              |                                    | •                             |                                  |                                            |                                             |
|                   | orf19.5634 | FRP1                     |                                         | •                      |                      |                                                   |                                                   |                                              |                                    | •                             | •                                |                                            |                                             |
|                   | orf19.6311 | orf19.6311               | •                                       |                        | •                    |                                                   |                                                   | •                                            | •                                  | •                             |                                  |                                            |                                             |
|                   | orf19.6844 | ICL1                     | •                                       |                        |                      |                                                   |                                                   | •                                            | •                                  |                               |                                  | •                                          |                                             |
|                   | orf19.7219 | FTR1                     |                                         |                        |                      |                                                   |                                                   |                                              | •                                  | •                             |                                  |                                            |                                             |
| orf19.97          | CAN1       | •                        |                                         |                        |                      | •                                                 | •                                                 |                                              |                                    | •                             |                                  | •                                          |                                             |
| DOWN              | orf19.2994 | RPL13                    |                                         |                        |                      |                                                   |                                                   |                                              |                                    |                               |                                  |                                            | •                                           |
|                   | orf19.6515 | HSP90                    |                                         |                        |                      |                                                   |                                                   |                                              |                                    |                               |                                  |                                            |                                             |
|                   | orf19.7231 | FTR2                     |                                         |                        |                      |                                                   |                                                   |                                              | •                                  |                               |                                  |                                            | •                                           |

(B) Genes down-regulated in previously published *C. albicans* stress responses.

| WOA core response |            |            | Acetic acid<br>20mM (5h) | Ammonium<br>iron(II)<br>sulfate<br>10µM | 23 to 37 °C<br>(30min) | NaCl 0.3M<br>(30min) | H <sub>2</sub> O <sub>2</sub><br>0.4mM<br>(30min) | H <sub>2</sub> O <sub>2</sub><br>0.5mM<br>(15min) | H <sub>2</sub> O <sub>2</sub> 5mM<br>(15min) | DPTA-<br>NONOate<br>1mM<br>(15min) | Congo red<br>100µg/µl<br>(2h) | Foetal calf<br>serum 10%<br>(1h) | pH 4 vs. pH<br>8 (4h)<br>[Bruno et<br>al.] | pH 4 vs. pH<br>8 (4h)<br>[Bensen et<br>al.] |  |
|-------------------|------------|------------|--------------------------|-----------------------------------------|------------------------|----------------------|---------------------------------------------------|---------------------------------------------------|----------------------------------------------|------------------------------------|-------------------------------|----------------------------------|--------------------------------------------|---------------------------------------------|--|
| UP                | orf19.1264 | CFL2       |                          |                                         |                        |                      |                                                   |                                                   |                                              |                                    |                               |                                  | •                                          |                                             |  |
|                   | orf19.1779 | MP65       |                          |                                         |                        |                      |                                                   |                                                   | •                                            |                                    |                               |                                  |                                            |                                             |  |
|                   | orf19.220  | PIR1       |                          | •                                       |                        |                      |                                                   | •                                                 |                                              |                                    |                               | •                                |                                            |                                             |  |
|                   | orf19.2344 | ASR1       |                          |                                         |                        |                      |                                                   |                                                   |                                              |                                    |                               |                                  |                                            | •                                           |  |
|                   | orf19.4211 | FET3       |                          |                                         | •                      | •                    |                                                   |                                                   | •                                            |                                    | •                             | •                                | •                                          |                                             |  |
|                   | orf19.4688 | DAG7       |                          |                                         | •                      |                      |                                                   | •                                                 | •                                            |                                    | •                             |                                  |                                            |                                             |  |
|                   | orf19.4716 | GDH3       |                          |                                         |                        | •                    |                                                   |                                                   | •                                            | •                                  |                               | •                                | •                                          |                                             |  |
|                   | orf19.5063 | COI1       |                          |                                         |                        |                      |                                                   |                                                   |                                              |                                    |                               |                                  |                                            |                                             |  |
|                   | orf19.5634 | FRP1       |                          |                                         |                        |                      |                                                   |                                                   | •                                            | •                                  |                               |                                  |                                            | •                                           |  |
|                   | orf19.6311 | orf19.6311 |                          |                                         |                        |                      |                                                   |                                                   |                                              |                                    |                               |                                  |                                            |                                             |  |
|                   | orf19.6844 | ICL1       |                          |                                         |                        |                      |                                                   |                                                   |                                              | •                                  |                               |                                  |                                            |                                             |  |
|                   | orf19.7219 | FTR1       |                          |                                         |                        |                      |                                                   |                                                   | •                                            |                                    |                               |                                  |                                            |                                             |  |
| orf19.97          | CAN1       |            |                          |                                         |                        |                      |                                                   |                                                   |                                              |                                    |                               |                                  |                                            |                                             |  |
| DOWN              | orf19.2994 | RPL13      | •                        |                                         |                        |                      |                                                   |                                                   |                                              |                                    |                               |                                  |                                            |                                             |  |
|                   | orf19.6515 | HSP90      |                          |                                         |                        |                      |                                                   |                                                   |                                              |                                    |                               |                                  |                                            |                                             |  |
|                   | orf19.7231 | FTR2       |                          | •                                       | •                      |                      | •                                                 | •                                                 | •                                            |                                    | •                             |                                  |                                            |                                             |  |
