# Supplementary material for: The Transcriptional Stress Response of Candida albicans to Weak Organic Acids
Source: PubMed Central journal article supplement (PMC4390566; doi:10.1534/g3.114.015941), 2015-01-29
Supplement: supp_g3.114.015941_TableS3.pdf [file supp_g3.114.015941_TableS3.pdf]

**Table S3** Quantitative RT-PCR primers used in this study.

| Primer name | Sequence                 |
|-------------|--------------------------|
| ASR1-RT-F   | ATGGCGATTCCAGTTATGGT     |
| ASR1-RT-R   | GCATCAAGATGGTCAACACC     |
| CAN1-RT-F   | CAAGCTGGTGTGCTCCTAA      |
| CAN1-RT-R   | TGACTGGAACAGGCCAAGTA     |
| CFL2-RT-F   | TATCGAAGGACGTCCAAACA     |
| CFL2-RT-R   | AGGATGTCCACACGTAACGA     |
| COI1-RT-F   | TGGATGTTATGAAACAACAAGATG |
| COI1-RT-R   | ATTTAGCACAAGCACCACCA     |
| CYB2-RT-F   | TACGGTTGATGCTCCACAAT     |
| CYB2-RT-R   | AAATGGCTCTTGCTGAACCT     |
| DAG7-RT-F   | CTCCATCAACAACCTCAGCAA    |
| DAG7-RT-R   | CAACAATGAAATCGGAATCG     |
| FET3-RT-F   | GCCATATTGAATGGCATTTG     |
| FET3-RT-R   | GGCATTACCTTCCCAGGATA     |
| FRP1-RT-F   | TTTGGTGCAACACCGTATTT     |
| FRP1-RT-R   | AACCCTGTCGATAACCAACC     |
| FTR1-RT-F   | ACTGGTGGTGATGCTTCTGA     |
| FTR1-RT-R   | CCGTTATCGGTTTCTGGATT     |
| FTR2-RT-F   | AATTTGTGGTCTTGCAGTGG     |
| FTR2-RT-R   | CTCTGGAGAACAACCAGCA      |
| HSP90-RT-F  | TACGAACCATTGACCAAAGC     |
| HSP90-RT-R  | CAGACCAACCAAATTGACCA     |
| ICL1-RT-F   | AGAAATTGGCCAAGGAATTG     |
| ICL1-RT-R   | GACGGCACATTGAGTACCAC     |
| MP65-RT-F   | AACTCTGGTGCTTGGGTCTT     |
| MP65-RT-R   | TAGATGGCCAACCAGTTTCA     |
| PIR1-RT-F   | GCTGCTGCTGCTACTACTGC     |
| PIR1-RT-R   | ACCAGTTGCAATTGCTTGAC     |
| RIP1-RT-F   | TGTACCCACTTGGGTTGTGT     |
| RIP1-RT-R   | ATGGAGCTGGACCCTTTCTA     |
| RPL13-RT-F  | TGCTAACGTCGCCAGATTAC     |
| RPL13-RT-R  | GGTTGTTCAACTGGGAAGGT     |
